# Supplementary material
Source: publisher figshare collection journal article supplement (https://gsapubs.figshare.com/articles/dataset/_/21919170)
Supplement: Supplementary file 1 [file 1]

## Sheet: TABLE S1
TABLE S1. LA-ICP-MS ZIRCON U–Pb ISOTOPIC AND TRACE ELEMENT DATA FOR THE GUSHICUN INTRUSIONS
Spot No.	Th	U	Th/U	Ratios							Ages (Ma)							SiO2	Ti	Y	Nb	Cs	Ba	La	Ce	Pr	Nd	Sm	Eu	Gd	Tb	Dy	Ho	Er	Tm	Yb	Lu	Hf	Ta	Th	U	TTi-in-zircona	f(O2)b
	(ppm)	(ppm)		207Pb/206Pb	± 1σ	207Pb/235U	± 1σ	206Pb/238U	± 1σ		207Pb/235U	± 1σ	206Pb/238U	± 1σ	207Pb/206Pb	± 1σ		(wt%)	(ppm)	(ppm)	(ppm)	(ppm)	(ppm)	(ppm)	(ppm)	(ppm)	(ppm)	(ppm)	(ppm)	(ppm)	(ppm)	(ppm)	(ppm)	(ppm)	(ppm)	(ppm)	(ppm)	(ppm)	(ppm)	(ppm)	(ppm)	℃	log
Gushicun granites
Longitude: 112°27′13.44″E, Latitude: 34°01′63.28″N
20XRHG-1-01	144.182	124.385	1.15916	0.112338	0.00195	0.324017	0.003356	5.06942	0.109776		1831	18.4071	1809.32	16.3702	1838.89	31.4825		36.4708	15.9531	1600.67	1.25403	0.0142997	3.32296	25.3344	71.7173	7.91941	40.0164	14.3226	1.83931	43.8758	12.7909	146.685	53.9208	232.117	46.6165	413.658	83.6793	8511.43	0.503672	144.182	124.385	867.772	-10.2595
20XRHG-1-02	290.423	249.947	1.16194	0.111498	0.001388	0.306173	0.002935	4.73962	0.072584		1774.27	12.8972	1721.85	14.5146	1823.76	17.75		36.5268	12.2239	2737.14	2.9759	0.0042274	0.763839	0.55867	23.8704	0.878543	10.6695	13.6972	2.17295	70.6273	21.7149	249.161	91.421	392.173	77.0965	679.368	132.618	8788.74	1.16812	290.423	249.947	837.251	-13.1434
20XRHG-1-03	66.2063	72.481	0.913431	0.106328	0.001749	0.311404	0.003435	4.56949	0.078191		1743.72	14.3043	1747.61	16.9115	1738.88	30.7075		36.7235	15.2271	1387.28	1.21201	0.0176993	2.07221	2.09611	14.2542	0.891035	6.9234	8.38122	1.237	37.4859	11.3655	124.392	46.9157	204.736	41.6601	369.408	74.6926	8499.79	0.494732	66.2063	72.481	862.312	-12.6604
20XRHG-1-04	177.587	156.568	1.13425	0.108877	0.001452	0.311382	0.002907	4.69529	0.068448		1766.4	12.2622	1747.5	14.3209	1780.56	19.445		36.3819	14.8542	2249.57	1.95759	0.0137217	0.112365	19.392	60.1586	6.41805	33.0858	16.1489	1.83602	60.8453	18.1848	203.048	74.7924	330.382	65.34	577.432	116.592	8363.36	0.661402	177.587	156.568	859.428	-10.8631
20XRHG-1-05	137.689	119.54	1.15183	0.111492	0.001613	0.307347	0.004363	4.74398	0.08956		1775.04	15.8777	1727.64	21.5357	1823.76	25.7725		36.6888	19.3225	2011.49	1.41053	0	1.64251	6.98851	33.0037	2.63435	17.6044	13.8012	2.0366	56.1564	17.0333	189.431	67.5956	289.418	55.9288	494.038	96.4441	8735.59	1.16923	137.689	119.54	890.795	-11.3076
20XRHG-1-06	472.417	259.598	1.8198	0.108517	0.001537	0.29152	0.003604	4.39689	0.08116		1711.76	15.3139	1649.12	18.0099	1775.93	30.5575		37.0708	14.2908	2951.03	3.58589	0	0.206084	0.88965	34.2784	0.931251	10.5259	16.0285	2.34368	77.3885	24.243	270.315	99.0665	425.295	82.7281	715.067	140.566	8317.11	0.866935	472.417	259.598	854.957	-12.3321
20XRHG-1-07	252.892	182.651	1.38457	0.108819	0.001782	0.324665	0.003297	4.9026	0.087967		1802.7	15.182	1812.47	16.0758	1779.94	29.7875		36.5633	13.5634	1687.67	2.29943	0.0198635	0.568305	2.37084	24.9837	0.748517	5.66831	7.65114	1.07835	39.2634	12.7517	147.853	55.8964	248.397	50.1557	446.183	89.8788	8410.31	0.744659	252.892	182.651	848.975	-12.6483
20XRHG-1-08	233.176	180.157	1.29429	0.107491	0.001643	0.327103	0.003562	4.87923	0.086741		1798.68	15.0306	1824.32	17.3295	1757.1	27.78		36.7848	13.4391	2665.28	1.98698	0	0.0700187	0.708444	20.1362	0.74576	8.73619	13.3478	2.0621	70.8091	21.7389	243.806	89.3478	381.496	74.4017	653.899	128.269	8355.59	0.623005	233.176	180.157	847.926	-13.0236
20XRHG-1-09	124.347	131.724	0.943997	0.113954	0.001757	0.304166	0.002634	4.80981	0.080589		1786.62	14.1368	1711.93	13.0538	1864.82	27.775		37.0133	19.4501	1756.28	1.87553	0	0.458799	0.0974762	12.8037	0.377393	5.19742	8.25713	1.48383	43.3792	13.3441	154.789	58.1926	257.107	52.089	467.373	95.8579	8277.11	0.608585	124.347	131.724	891.602	-13.0269
20XRHG-1-10	233.548	164.401	1.4206	0.107489	0.001461	0.325999	0.003006	4.85278	0.069677		1794.1	12.1495	1818.96	14.6471	1757.1	25.465		36.446	12.624	2246.01	1.62435	0.0110927	0.350664	8.1825	37.7235	2.79621	18.6382	14.5787	1.94757	61.8876	18.639	206.395	75.1355	321.042	62.996	544.108	108.242	8508.76	0.566973	233.548	164.401	840.856	-11.9406
20XRHG-1-11	285.492	199.441	1.43147	0.108768	0.001467	0.317581	0.002906	4.78866	0.072919		1782.91	12.8479	1777.9	14.2524	1788.89	24.69		36.9173	12.9247	3212.48	2.08791	0.0161893	0	0.062133	21.4354	0.741899	10.4162	18.7113	2.5903	90.4588	26.8268	302.792	109.292	457.794	88.4033	756.373	147.073	8413.45	0.633478	285.492	199.441	843.506	-13.0572
20XRHG-1-12	131.03	104.203	1.25745	0.110911	0.001752	0.320634	0.003366	4.92064	0.084513		1805.8	14.5457	1792.83	16.461	1814.5	27.9325		36.6119	13.9744	2313.23	0.94591	0.0131081	0	0.0623715	13.086	0.646304	9.26956	14.8525	2.14773	66.6531	19.9493	218.306	77.9188	327.679	63.3456	547.905	106.961	8520.48	0.4461	131.03	104.203	852.385	-13.2426
20XRHG-1-13	409.035	262.93	1.55568	0.108238	0.001469	0.316042	0.002756	4.7406	0.069812		1774.45	12.407	1770.37	13.5345	1770.06	24.23		36.683	11.2887	3917.32	3.13923	0	0.0422765	0.226513	29.3851	0.92388	12.5524	21.9302	2.99817	108.889	33.1523	370.71	133.533	556.937	107.674	917.181	176.921	8368.01	0.874642	409.035	262.931	828.443	-12.9364
20XRHG-1-14	169.564	148.375	1.1428	0.108158	0.001672	0.320739	0.003249	4.80181	0.079832		1785.21	14.0241	1793.34	15.8886	1768.83	29.17		36.6196	16.8704	2187.22	1.49618	0.0417929	2.53182	0.0817415	16.5187	0.466009	7.02976	12.0631	1.70614	59.0102	17.9304	204.18	73.9436	316.505	62.1711	540.94	106.109	8731.12	0.522893	169.564	148.376	874.394	-12.8847
20XRHG-1-15	280.812	180.883	1.55245	0.107297	0.001661	0.318458	0.003188	4.72855	0.078116		1772.31	13.8985	1782.2	15.6178	1754.01	28.8625		36.7629	12.4906	2671.33	2.11758	0.0348679	0.181949	0.164452	23.615	0.631602	9.84531	15.8553	2.36375	74.83	22.6374	250.411	89.4555	380.618	75.2105	639.345	125.974	8458.35	0.630007	280.812	180.883	839.665	-12.8515
20XRHG-1-16	127.658	117.564	1.08586	0.111671	0.001741	0.313994	0.003176	4.86012	0.085671		1795.37	14.8944	1760.33	15.6115	1827.78	28.0875		36.5396	14.9022	1648.9	1.34634	0	1.25861	3.58263	21.0573	1.33963	9.73808	8.7684	1.3277	43.072	13.0617	149.307	54.8696	240.116	48.1486	428.799	85.7713	8562.3	0.473847	127.658	117.564	859.802	-12.4326
20XRHG-1-17	160.571	149.536	1.0738	0.109826	0.001632	0.288052	0.004381	4.36042	0.081393		1704.87	15.4612	1631.79	21.9414	1798.15	31.9475
20XRHG-1-18	229.683	167.856	1.36833	0.109279	0.001519	0.312328	0.00268	4.72105	0.069172		1770.98	12.3358	1752.15	13.1981	1787.35	25.4625		36.8216	12.3018	3109.96	2.05727	0.00750856	0.0570328	0.130642	18.2153	0.720567	10.9996	18.1607	2.4908	90.2409	26.6338	294.203	105.557	439.102	84.1819	719.787	141.015	8250.02	0.615654	229.683	167.856	837.961	-13.2584
20XRHG-1-19	191.694	171.166	1.11993	0.111556	0.001528	0.287307	0.002923	4.43981	0.072642		1719.8	13.6096	1628.06	14.6647	1824.99	25.1575
20XRHG-1-20	213.978	162.801	1.31435	0.10827	0.001522	0.331283	0.003975	4.95061	0.081016		1810.93	13.8789	1844.6	19.2747	1772.22	24.85		36.5675	13.4626	2904.72	1.74427	0	0.152865	0.100043	18.2463	0.664263	10.444	17.647	2.48211	83.9823	25.192	278.873	98.0726	412.218	80.7902	686.198	134.075	8479.65	0.615042	213.978	162.801	848.125	-13.1044
20XRHG-1-21	387.005	246.301	1.57127	0.108436	0.001371	0.319627	0.002886	4.79532	0.067493		1784.08	11.8874	1787.91	14.1308	1773.15	22.8425		36.9078	12.3111	3895.35	3.11127	0	0.203248	0.207807	29.4591	0.83995	13.9991	22.9617	3.5906	110.949	33.5885	375.401	131.999	554.902	105.922	911.588	177.204	8175.35	0.798521	387.005	246.301	838.045	-12.7556
20XRHG-1-22	226.349	164.05	1.37976	0.118046	0.002026	0.339549	0.0063	5.6388	0.171067		1922.05	26.1967	1884.5	30.3334	1927.79	30.555
20XRHG-1-23	234.745	172.712	1.35917	0.111715	0.001765	0.310468	0.003553	4.80947	0.100387		1786.56	17.5877	1743.01	17.5032	1827.78	29.475		36.5182	12.8378	2586.23	1.84273	0	0.123657	0.623987	21.173	0.721196	9.45972	14.5779	1.98114	70.1302	21.5551	242.363	88.6214	371.2	71.7976	622.692	122.632	8699.63	0.676527	234.745	172.712	842.745	-12.963
20XRHG-1-24	160.06	133.163	1.20199	0.227974	0.019831	0.480822	0.038193	24.6414	3.9096		3294.11	154.834	2530.85	166.269	3037.97	140.588
20XRHG-1-25	193.102	142.675	1.35344	0.111664	0.001565	0.318259	0.002547	4.9198	0.076181		1805.66	13.1243	1781.22	12.4899	1827.78	21.3
20XRHG-1-26	114.837	132.337	0.867759	0.110363	0.001504	0.300557	0.003621	4.59167	0.078991		1747.76	14.3931	1694.07	17.9719	1805.25	25.465		36.6694	20.4453	1021.75	1.53932	0.0137887	0.258204	0.110592	14.1285	0.218627	2.72901	4.79445	0.729121	22.6518	7.38632	87.456	33.4163	154.887	32.7584	302.09	62.4538	8758.43	0.79392	114.837	132.337	897.76	-12.7909
20XRHG-1-27	275.418	185.45	1.48514	0.110795	0.001468	0.314384	0.002642	4.82752	0.070607		1789.71	12.3626	1762.24	12.9924	1812.96	24.075		36.4055	14.7545	2366.52	1.90137	0.0111594	4.28503	61.885	161.853	18.71	91.7013	27.8596	2.79343	74.0115	20.4741	220.209	79.5231	337.442	65.4501	566.417	113.023	8513.95	0.616172	275.418	185.45	858.647	-9.30095
20XRHG-1-28	191.194	153.8	1.24314	0.108036	0.001478	0.318856	0.003005	4.77459	0.07087		1780.44	12.5203	1784.14	14.7216	1766.35	24.23		36.2522	15.3536	2487.69	1.7226	0	1.03416	20.19	58.714	6.15688	33.9552	17.1837	2.16711	69.7267	20.5923	228.427	84.0344	356.625	70.4565	611.137	120.345	8671.64	0.554038	191.194	153.8	863.278	-10.8441
20XRHG-1-29	354.208	224.873	1.57515	0.108516	0.001529	0.308223	0.002664	4.63624	0.065769		1755.82	11.9085	1731.95	13.1602	1775.93	30.5575		36.3591	22.0078	2838.07	2.73367	0.0241549	0.0562956	0.758166	30.5849	0.786914	10.4934	17.1402	2.26077	77.897	23.7439	263.788	96.4301	405.114	79.3456	692.562	136.09	8572.72	0.795099	354.208	224.873	906.967	-11.8083
20XRHG-1-30	129.634	116.947	1.10849	0.110017	0.001928	0.323088	0.003202	4.94448	0.093054		1809.88	15.9423	1804.79	15.6314	1799.69	31.485
20XRHG-1-31	439.409	286.302	1.53478	0.108099	0.001575	0.322855	0.003305	4.8519	0.077877		1793.94	13.5676	1803.66	16.1337	1768.52	25.9275		36.9678	11.7917	4144.64	3.24815	0.0108172	0.29748	0.140537	28.4736	0.80754	12.1783	23.282	3.37588	112.285	35.2743	388.147	140.377	592.231	113.62	976.265	188.926	8611.68	0.936925	439.409	286.302	833.25	-13.0049
20XRHG-1-32	348.634	220.58	1.58054	0.109938	0.001609	0.313698	0.002897	4.78186	0.070644		1781.72	12.4652	1758.88	14.2493	1798.46	26.385		37.1085	23.3112	3574.48	2.76037	0	0.693196	0.45296	28.5812	0.961163	13.209	20.5178	3.314	101.552	30.9115	338.966	122.142	511.639	98.9042	838.11	164.848	8572.24	0.681721	348.634	220.58	914.262	-11.8295
20XRHG-1-33	291.646	201.643	1.44635	0.107494	0.001446	0.320838	0.003158	4.78687	0.072453		1782.6	12.7705	1793.82	15.4423	1757.1	25.465		36.5161	14.9158	2353.89	1.91834	0	2.54973	0.213992	20.3723	0.505759	7.88893	12.4751	1.89362	61.7116	19.2732	216.831	80.253	341.301	67.2469	586.946	116.07	8464.41	0.693004	291.646	201.643	859.908	-12.9571
20XRHG-1-34	330.34	215.657	1.53179	0.106963	0.001431	0.317352	0.003132	4.70995	0.073194		1769.01	13.0714	1776.79	15.3559	1749.99	24.23		36.9626	15.9971	3467.34	2.53306	0	0.679017	0.166395	21.2145	0.704434	10.8398	17.3908	2.93475	89.3755	28.603	319.945	116.337	489.112	95.7377	811.654	160.307	8426.77	0.696017	330.34	215.657	868.096	-12.8484
20XRHG-1-35	409.979	231.226	1.77306	0.108582	0.001422	0.317841	0.00293	4.78019	0.068716		1781.42	12.1317	1779.17	14.3665	1775.93	24.075		36.5449	18.8405	2546.06	2.95906	0	0	0.0784191	25.6066	0.450684	7.37372	12.3589	1.69425	62.4235	19.7458	225.331	84.6713	368.345	71.8264	627.193	124.643	8315.59	0.936531	409.979	231.226	887.706	-12.356
20XRHG-1-36	388.989	243.41	1.59808	0.107983	0.001301	0.31233	0.003288	4.66959	0.067915		1761.81	12.2219	1752.16	16.1772	1765.73	21.9175		36.7362	14.126	3710.33	2.64223	0	0.168986	0.117359	24.6508	0.810231	11.4925	18.4749	3.03198	100.903	30.89	346.289	125.437	524.919	101.48	864.898	169.14	8390.14	0.740385	388.989	243.41	853.623	-12.8647
20XRHG-1-37	152.131	139.74	1.08867	0.109064	0.001548	0.326554	0.004239	4.92376	0.086905		1806.34	14.9468	1821.66	20.6248	1783.64	25.93		36.9818	11.1761	2005.47	1.92916	0.0163011	0.58358	0.130222	16.4339	0.460008	6.39035	10.5479	1.58243	51.1386	15.7549	180.144	66.9615	294.381	59.1759	544.262	104.674	8736.34	0.564815	152.131	139.74	827.343	-13.4106
20XRHG-1-38	142.577	120.485	1.18336	0.107543	0.001624	0.318267	0.003118	4.73371	0.079176		1773.23	14.0731	1781.26	15.2797	1758.33	27.78		36.7597	13.2908	1979.61	1.37152	0.0286041	0.0570048	0.125785	14.2486	0.442296	6.70061	10.6045	1.75357	52.8321	16.1028	180.873	66.4985	286.397	56.6988	503.209	99.7971	8709.96	0.531609	142.577	120.485	846.666	-13.2902
20XRHG-1-39	203.853	172.529	1.18156	0.108905	0.001551	0.322368	0.003323	4.85424	0.080871		1794.35	14.0796	1801.28	16.2263	1781.17	25.93		36.5255	14.0662	2174.13	1.98461	0	0	0.0478296	17.0809	0.435148	6.43398	10.6659	1.65366	53.3056	17.0286	194.747	72.7353	316.031	63.7684	560.266	113.027	8492.13	0.652272	203.853	172.529	853.136	-13.2088
20XRHG-1-40	151.624	127.818	1.18625	0.109646	0.001705	0.325039	0.004325	4.91118	0.090544		1804.18	15.6014	1814.29	21.0625	1794.44	28.0875		36.5382	15.5173	1775.02	1.58965	0	0.124574	5.1146	26.6776	1.63647	11.9741	10.4869	1.52441	47.1764	14.3165	160.666	59.0543	258.02	50.8994	458.029	91.8674	8567.3	0.55677	151.624	127.818	864.519	-12.0385
20XRHG-1-41	205.788	151.072	1.36219	0.108542	0.001634	0.308539	0.002832	4.63549	0.077911		1755.68	14.0884	1733.51	13.9851	1775.93	27.4725		36.0282	17.1361	3624.6	1.59773	0.0240138	0.297143	0.64421	15.8913	0.907759	11.1981	18.8455	4.84416	94.1853	33.5286	379.502	123.539	485.364	86.4136	704.826	134.3	8531.3	0.577642	205.788	151.072	876.259	-12.9459
20XRHG-1-42	167.651	143.348	1.16953	0.12214	0.002375	0.291486	0.003414	4.88592	0.089417		1799.83	15.4738	1648.95	17.0647	1987.96	34.1
20XRHG-1-43	407.942	245.603	1.66098	0.109371	0.001311	0.306238	0.00252	4.64372	0.061887		1757.16	11.1982	1722.17	12.469	1790.74	21.1425		36.6271	28.488	3131.96	3.03053	0	0.083843	0.396252	29.5819	0.777103	10.0542	16.982	2.50403	82.6321	25.4607	286.516	104.276	448.116	87.959	752.895	149.315	8306.02	0.946525	407.943	245.603	940.409	-11.5851
20XRHG-1-44	241.047	174.491	1.38143	0.108165	0.001448	0.321006	0.003211	4.8103	0.071106		1786.7	12.4854	1794.64	15.7007	1768.83	25.1575		36.4655	14.2328	2585.58	1.96858	0.0132833	0.0140941	0.0830608	20.3215	0.497743	8.7747	13.2507	2.0778	69.4751	21.6381	238.811	85.9324	369.684	72.2629	624.751	122.631	8461.86	0.643839	241.047	174.491	854.49	-12.9007
20XRHG-1-45	206.723	151.635	1.36329	0.108981	0.00168	0.314796	0.002779	4.75717	0.075295		1777.37	13.3345	1764.27	13.6563	1783.34	28.0875		36.3857	12.6414	2804.43	1.52162	0.0134116	0	0.0532112	18.1024	0.621531	10.7022	15.8388	2.3492	79.2006	23.7496	263.411	94.0682	397.256	76.5161	661.159	127.786	8674.48	0.541556	206.723	151.635	841.011	-13.1434
20XRHG-1-46	340.275	220.983	1.53982	0.110117	0.001804	0.313806	0.003279	4.80313	0.088053		1785.45	15.4545	1759.41	16.1161	1811.11	29.63		36.4696	15.7875	3572.49	2.51311	0	0.0561154	0.0999361	21.6223	0.72653	10.8357	18.7461	2.88029	96.1842	29.8441	333.209	120.787	506.852	96.3034	829.733	160.779	8523.18	0.645648	340.275	220.983	866.544	-12.8547
20XRHG-1-47	218.169	160.69	1.3577	0.107872	0.001769	0.317447	0.002929	4.74887	0.077392		1775.91	13.7225	1777.25	14.3632	1764.81	-2.7775		36.4675	11.1955	2691.45	1.61982	0	0.0440734	0.0848509	20.4527	0.581507	9.41595	15.7387	2.33933	75.6495	22.3363	252.501	90.7629	383.206	74.7876	641.888	125.724	8556.81	0.529844	218.169	160.69	827.534	-13.1496
20XRHG-1-48	412.784	260.387	1.58527	0.109169	0.001531	0.327817	0.003568	4.96733	0.079988		1813.78	13.6663	1827.79	17.3517	1787.04	24.845		36.2408	13.5966	4007.1	3.14935	0.00363523	0.369838	12.1602	60.2014	4.60262	30.9498	26.4031	3.39956	116.62	34.7906	379.956	136.83	570.134	108.742	941.057	181.206	8372.93	0.835373	412.784	260.387	849.253	-11.4257
20XRHG-1-49	268.876	188.524	1.42621	0.117898	0.001851	0.318991	0.002911	5.24243	0.100518		1859.54	16.3989	1784.8	14.2584	1924.38	28.86
20XRHG-1-50	247.23	187.309	1.31991	0.107811	0.001403	0.315948	0.002659	4.71667	0.062745		1770.2	11.2095	1769.91	13.0615	1762.65	24.2325		36.2747	12.7314	2995.51	1.81374	0	0.153502	1.4187	18.8032	0.921132	10.0569	15.5174	2.22998	82.5409	24.6245	276.992	100.706	426.147	82.8475	713.988	139.446	8459.87	0.615399	247.23	187.309	841.808	-13.2511
20XRHG-1-51	324.236	216.867	1.49509	0.107313	0.001416	0.314783	0.002875	4.67465	0.066048		1762.71	11.8788	1764.2	14.1286	1754.01	28.705		36.565	12.5872	3287.78	2.31676	0.426218	0.510678	2.21438	30.6617	1.17437	13.3936	19.0106	2.62568	92.5014	28.0633	311.082	111.664	468.793	90.3626	785.82	152.814	8409.63	0.7284	324.236	216.867	840.529	-12.545
Gushicun granites
Longitude: 112°27′68.37″E, Latitude: 34°01′42.49″N
20XRHG-2-01	216	179	1.2067	0.112	0.0015	0.2919	0.0033	4.5357	0.0752		1738	13.8377	1651	16.7351	1832	25.465		32.7313	13.4213	2967.36	1.79958	1.56856	0.0538008	0.118267	17.8396	0.68828	10.4843	15.4139	2.30636	78.1296	24.2714	273.891	99.888	421.549	82.3075	710.379	139.256	8241.01	0.571515	216.294	178.532	847.776	-13.494
20XRHG-2-02	359.834	227.261	1.58336	0.108952	0.001498	0.316428	0.003596	4.78512	0.077161		1782.29	13.5971	1772.26	17.6374	1783.34	20.2175		32.7313	12.5124	3117.51	2.37936	0.254305	0.0316656	0.0859463	20.1169	0.609843	8.61977	15.1059	2.33159	79.4751	25.3237	286.511	104.103	444.228	86.3192	741.054	145.96	7560.29	0.724395	359.834	227.261	839.86	-13.5918
20XRHG-2-03	296	206	1.43689	0.1106	0.0017	0.3216	0.0034	4.9335	0.0813		1808	13.9705	1797	16.4952	1809	27.78		32.7313	12.6006	3187.82	2.18754	0.0106059	0.0534491	5.97893	35.7579	2.60612	19.8158	19.9902	2.68797	92.3562	27.6572	304.042	108.274	455.656	87.9554	758.103	147.228	7713.67	0.659293	296.058	205.544	840.648	-12.4962
20XRHG-2-04	253	222	1.13964	0.1114	0.0018	0.2493	0.0049	3.83	0.0843		1599	17.7472	1435	25.2167	1833	28.5525		32.7313	12.8613	2554.27	2.54028	0.00775945	0.632763	0.575652	24.6247	0.874737	10.3601	15.6064	2.25266	70.5024	21.5496	238.356	86.8832	367.306	72.4605	630.314	124.43	7982.47	0.66945	253.247	222.424	842.952	-13.1841
20XRHG-2-05	506.856	361.744	1.40114	0.109101	0.001504	0.280947	0.003064	4.2547	0.067434		1684.64	13.0807	1596.13	15.4418	1784.26	25.31		32.7313	14.0517	3534.1	5.30314	0	1.69133	0.533118	41.4893	1.03932	12.3542	17.8513	2.74223	88.7832	27.4221	316.894	118.599	508.006	99.9828	871.234	168.867	8061.49	1.35882	506.856	361.744	853.018	-12.5782
20XRHG-2-06	158.395	120.978	1.30929	0.109035	0.001517	0.318075	0.00278	4.8133	0.071452		1787.23	12.5392	1780.32	13.6288	1783.64	25.775		32.7313	10.7818	2552.27	1.26192	0.00320406	0	0.0735382	13.8924	0.598001	9.22155	14.7855	2.25757	71.3562	21.6596	238.412	86.3085	360.227	69.3044	589.744	113.946	7870.25	0.423251	158.395	120.978	823.422	-13.8929
20XRHG-2-07	282	188	1.5	0.1093	0.0015	0.3187	0.0027	4.8315	0.0713		1790	12.4774	1784	13.4645	1787	25.77		32.7313	13.1888	3489.34	2.27495	0.0111839	0.054268	0.0750673	18.6542	0.709823	10.4534	18.5606	2.63852	95.4008	29.5563	330.051	119.531	498.069	94.7306	806.09	157.191	7849.77	0.707521	281.673	187.704	845.793	-13.4841
20XRHG-2-08	340.006	348.058	0.976867	0.109051	0.001293	0.324239	0.003354	4.90922	0.072092		1803.84	12.4482	1810.4	16.3567	1783.64	21.76		32.7313	7.56446	3087.49	4.42172	0.0331212	0.19634	0.177507	26.9564	0.912645	12.9157	16.6783	0.451727	77.065	24.1381	270.401	101.952	441.177	84.0777	699.943	133.026	10195.5	2.20481	340.006	348.058	786.174	-14.149
20XRHG-2-09	273	179	1.52514	0.109	0.0014	0.3301	0.0027	4.9929	0.0683		1818	11.6383	1839	13.1623	1784	22.995		32.7313	15.2656	2363.65	2.20203	0	10.7931	0.309341	21.4266	0.589172	7.85346	12.2305	1.69008	60.4947	18.9506	217.306	79.3953	340.565	66.6597	580.848	113.595	7843.75	0.59854	272.533	178.941	862.607	-13
20XRHG-2-10	132.919	108.342	1.22685	0.107115	0.001698	0.325463	0.002894	4.8315	0.079088		1790.4	13.8246	1816.35	14.1113	1750.92	28.705		32.7313	11.4136	1993.49	1.17727	0.251666	1.33068	0.0732751	14.568	0.444218	7.23571	12.1889	1.61543	57.2701	17.1098	189.456	68.1289	287.168	56.4688	488.377	94.6882	8087.61	0.408642	132.919	108.342	829.653	-13.636
20XRHG-2-11	330.226	215.411	1.533	0.107638	0.001613	0.325374	0.003986	4.85488	0.086282		1794.46	15.0131	1815.92	19.4115	1761.11	27.1625		32.7313	11.2819	3258.68	2.72281	0.00745442	0.123701	0.140595	23.6998	0.73384	11.051	17.9588	2.655	90.9327	27.698	308.889	111.788	465.957	89.8962	770.036	149.866	8051.15	0.681539	330.226	215.412	828.377	-13.4038
20XRHG-2-12	298.697	286.894	1.04114	0.108435	0.001484	0.298279	0.005768	4.50324	0.106025		1731.57	19.5978	1682.77	28.6555	1773.15	25.005		32.7313	10.6877	3142.89	3.42468	0	1.3097	0.408369	25.4779	0.959226	11.9613	17.0119	2.76665	86.0976	25.6598	289.499	104.506	450.63	89.0079	759.962	149.633	8001.55	2.27316	298.697	286.894	822.469	-13.6017
20XRHG-2-13	273	165	1.65454	0.1262	0.002	0.2989	0.0022	5.2283	0.0852		1857	13.9541	1686	10.9428	2046	29.165		32.7313	12.2766	2037.97	1.51	0	0.190786	1.24785	17.7016	0.906199	8.88212	11.7644	1.74575	54.767	16.758	190.163	69.6879	293.968	58.2305	500.293	98.7856	8865.82	0.658503	129.026	131.37	837.732	-13.3644
20XRHG-2-14	129	131	0.984733	0.1144	0.0017	0.3023	0.003	4.8007	0.0835		1785	14.6686	1703	14.8807	1872	27.315
20XRHG-2-15	276	189	1.46032	0.1096	0.0015	0.3185	0.0033	4.8322	0.0744		1791	13.0184	1782	16.3526	1794	24.0725		32.7313	13.3123	3151.18	2.02792	0.00983919	0.106641	0.126429	17.7609	0.666701	10.2114	16.6139	2.6648	86.659	26.4028	297.498	107.638	455.615	88.2254	745.857	145.926	7717.09	0.615825	276.05	188.737	846.849	-13.5612
20XRHG-2-16	174	233	0.746781	0.1442	0.0018	0.4326	0.0039	8.645	0.1201		2301	12.7445	2318	17.6721	2280	20.8325		32.7313	6.32867	1338.8	2.09852	0	0.0761801	0.0518983	16.9702	0.331808	5.36686	8.43946	0.925928	37.4722	11.3333	127.11	45.9946	196.164	38.9232	340.709	67.5614	9083.11	0.806287	173.556	233.211	768.368	-14.8515
20XRHG-2-17	215	189	1.13757	0.1112	0.0015	0.3279	0.0035	5.0511	0.0805		1828	13.568	1828	16.9624	1820	25.0025		32.7313	9.75643	2620.26	1.70523	0.032258	0.0771187	0.274879	18.0072	0.685495	8.90543	13.4555	1.79228	68.7797	21.2748	243.071	89.1226	377.635	74.5225	637.714	125.156	8298.66	0.659853	215.26	189.272	812.656	-13.9691
20XRHG-2-18	177	128	1.38281	0.1143	0.0019	0.3307	0.0038	5.2441	0.103		1860	16.7896	1842	18.5153	1868	29.475
20XRHG-2-19	398	234	1.70086	0.1112	0.0017	0.3254	0.0035	5.0127	0.0846		1821	14.3385	1816	16.9811	1820	27.4725		32.7313	10.5408	3600.57	2.56693	0.164313	0.157009	0.40408	27.2104	0.83531	12.4251	20.4511	2.89973	101.571	30.6839	345.165	123.196	519.418	99.3026	841.198	162.91	7870.42	0.672765	398.346	233.846	820.968	-13.3291
20XRHG-2-20	404	266	1.5188	0.1102	0.0017	0.3111	0.0035	4.7617	0.0883		1778	15.6135	1746	17.1329	1803	27.7775		32.7313	11.2457	3316.34	3.47726	0.0116591	0.469624	0.673306	31.1566	1.05614	12.6032	20.2076	2.70422	92.2113	28.3623	314.683	113.994	481.629	93.6372	796.803	154.816	8010.15	0.899863	404.19	265.94	828.025	-13.1161
Gushicun diorites
Longitude: 112°28′16.86″E, Latitude: 34°01′55.73″N
20XRdelt-3-01	212.096	204.67	1.03628	0.114205	0.001515	0.288262	0.003733	4.5685	0.084044		1743.54	15.3706	1632.84	18.6991	1933.34	23.765
20XRdelt-3-02	259.589	187.201	1.38668	0.111804	0.001559	0.309494	0.00314	4.79062	0.079282		1783.26	13.9549	1738.21	15.4842	1828.7	25.315
20XRdelt-3-03	115.055	102.452	1.12302	0.108446	0.00154	0.31058	0.003539	4.65176	0.077362		1758.61	13.95	1743.56	17.4344	1773.77	25.93		36.2451	16.7153	1724.82	1.28133	0	0.385059	0.663205	14.5935	0.720798	6.97788	9.98086	1.47998	46.2618	14.2149	161.205	58.8306	252.915	49.4066	434.551	86.5525	8897.31	0.53947	115.055	102.452	873.295	-13.0577
20XRdelt-3-04	120.51	130.468	0.923682	0.109916	0.001721	0.325335	0.004238	4.93633	0.09323		1808.49	15.9939	1815.73	20.6381	1797.84	29.1675		36.6423	18.0302	1718.52	2.08784	0.00064746	6.71478	0.305292	13.8452	0.363419	4.75702	8.15411	1.32904	41.2184	12.7997	148.293	56.7821	255.533	52.4984	473.17	98.5444	8284.77	0.683825	120.511	130.468	882.371	-13.2543
20XRdelt-3-05	446.731	241.906	1.84671	0.108273	0.001342	0.311844	0.0027	4.6739	0.066936		1762.58	12.0384	1749.78	13.301	1772.22	23.3075		36.7629	29.251	2553.25	3.21672	0.0262655	21.4624	1.11846	31.7566	0.655951	7.84281	12.7861	1.79864	65.5396	20.0343	232.962	85.3811	366.791	72.6035	631.062	124.254	8300.11	0.891599	446.731	241.906	943.941	-11.6787
20XRdelt-3-06	1889.63	1093.58	1.72792	0.102591	0.001065	0.266178	0.003478	3.78602	0.062172		1589.79	13.2344	1521.37	17.7254	1672.21	23.15		40.0538	8.96272	5103.38	5.59067	0	7.15583	0.411747	95.0433	1.24229	17.9896	26.0508	2.59558	114.296	37.127	420.858	155.82	701.403	148.63	1311.45	243.525	8936.22	2.80577	1889.63	1093.58	803.679	-12.7211
20XRdelt-3-07	620.146	584.046	1.06181	0.105114	0.001138	0.286659	0.003958	4.17511	0.069994		1669.15	13.78	1624.81	19.8504	1716.66	20.0575		36.9516	6.02372	3543.01	9.78113	0.0290342	4.66862	2.40376	51.1313	1.08438	9.81525	11.7973	1.76848	54.305	19.7803	248.224	96.3782	452.966	100.234	932.541	184.888	13774	12.2657	620.147	584.046	763.544	-13.8022
20XRdelt-3-08	256.487	194.691	1.31741	0.111525	0.001563	0.303603	0.002994	4.70241	0.08048		1767.67	14.3807	1709.15	14.8352	1824.38	25.465
20XRdelt-3-09	272.13	181.035	1.50319	0.110563	0.001521	0.315852	0.003363	4.849	0.081659		1793.44	14.2282	1769.44	16.5036	1809.26	25.7725		36.5274	14.7594	3230.56	2.09791	0	1.96689	0.269732	23.2694	0.892177	12.789	19.168	2.70639	95.0531	28.3631	310.665	109.936	463.164	89.2339	755.8	148.184	8484.91	0.60008	272.13	181.035	858.685	-12.9139
20XRdelt-3-10	229.756	172.275	1.33366	0.112862	0.002049	0.298205	0.002935	4.66245	0.084611		1760.53	15.2195	1682.4	14.6	1855.56	33.49
20XRdelt-3-11	251.244	234.054	1.07344	0.11011	0.001844	0.251731	0.005804	3.85347	0.108464		1603.99	22.7177	1447.4	29.9011	1811.11	29.475
20XRdelt-3-12	300.755	207.202	1.4515	0.108445	0.001621	0.30845	0.002827	4.64271	0.071757		1756.98	12.9675	1733.08	13.9583	1773.15	32.41		36.196	13.3057	3647.3	2.27804	0	0.0428183	0.144532	20.9773	0.871222	11.2475	18.9257	2.86218	104.047	30.5499	342.443	124.641	516.572	99.0972	840.917	164.622	8360.22	0.751385	300.755	207.202	846.793	-13.3544
20XRdelt-3-13	313.552	239.351	1.31001	0.110696	0.001706	0.287334	0.004766	4.3983	0.086416		1712.02	16.296	1628.19	23.8833	1810.8	27.7775
20XRdelt-3-14	312.248	204.064	1.53015	0.115762	0.00172	0.312458	0.002626	5.02053	0.078595		1822.79	13.3131	1752.79	12.9315	1891.66	26.85
20XRdelt-3-15	142.979	124.31	1.15017	0.108645	0.001518	0.320901	0.003016	4.82972	0.072254		1790.09	12.6434	1794.13	14.7533	1776.86	25.62		36.4272	16.4503	1700.23	1.42606	0.00754964	4.74978	0.363805	14.2787	0.36145	5.6024	9.42808	1.26681	42.4364	13.1028	153.844	57.3245	246.065	48.3439	431.814	85.9651	8651.56	0.532622	142.979	124.31	871.398	-13.2856
20XRdelt-3-16	151.013	140.522	1.07465	0.10785	0.001457	0.322092	0.003277	4.80918	0.072864		1786.51	12.7936	1799.94	16.0083	1764.81	24.54		36.4011	14.5916	1353.32	1.65748	0	0.0142876	0.372231	13.7991	0.224131	3.43885	6.43011	0.940153	30.1492	9.73928	115.848	44.7146	203.892	41.9459	381.94	79.0336	8388.08	0.597933	151.013	140.522	857.361	-13.6171
20XRdelt-3-17	140.1	350.598	0.399602	0.144475	0.001525	0.341389	0.003806	6.8474	0.103996		2091.87	13.5312	1893.35	18.3187	2283.34	17.435		36.3474	6.49212	575.921	4.30563	0	0.671933	0.796267	19.8732	0.4456	2.41746	2.33875	0.144658	11.3799	3.79994	47.1883	18.6839	91.019	19.5879	183.416	37.8451	10167.9	1.40352	140.099	350.598	770.877	-14.8964
20XRdelt-3-18	7797.2	1062.89	7.33587	0.10337	0.001069	0.234307	0.006379	3.37857	0.101407		1499.44	23.5381	1357.04	33.3241	1687.04	19.6025
20XRdelt-3-19	3795.95	1587.99	2.39041	0.100899	0.001033	0.222939	0.003688	3.12329	0.061371		1438.44	15.1445	1297.39	19.4526	1640.43	19.905
20XRdelt-3-20	126.748	102.196	1.24024	0.119585	0.002119	0.317802	0.003159	5.26549	0.10454		1863.29	16.989	1778.99	15.4815	1950.31	31.48
20XRdelt-3-21	207.579	161.704	1.2837	0.108922	0.001495	0.311196	0.003062	4.68201	0.070902		1764.03	12.727	1746.59	15.0816	1781.17	19.9075		37.2731	18.2119	2310.08	1.75059	0.00189711	37.4509	5.48216	29.4277	1.98473	14.6308	14.2669	1.94567	64.054	19.2122	216.065	79.1185	334.897	65.9696	573.966	112.813	8420.46	0.562493	207.579	161.704	883.584	-12.1176
20XRdelt-3-22	125.429	119.934	1.04582	0.10786	0.001542	0.326726	0.003303	4.8732	0.080059		1797.63	13.8949	1822.49	16.0771	1764.81	25.9275		36.6007	20.07	1203.49	1.40411	0.00597369	3.42163	0.128096	14.3971	0.20998	3.24629	5.15669	0.85794	26.9475	8.76711	104.237	40.0727	177.717	36.8489	329.395	67.2981	8575.49	0.502885	125.429	119.934	895.466	-12.9651
20XRdelt-3-23	164.94	144.122	1.14445	0.10816	0.001582	0.310639	0.002776	4.64178	0.072414		1756.82	13.0874	1743.85	13.6875	1768.83	26.39		35.7949	12.5149	2172.56	1.52178	0	2.67948	0.0758039	15.9108	0.422958	6.9133	11.0853	1.63718	55.9058	17.2046	198.893	72.1079	306.924	61.1138	529.808	105.605	8612.2	0.58492	164.94	144.122	839.882	-13.6039
20XRdelt-3-24	88.3465	92.2298	0.957896	0.107882	0.001686	0.333536	0.004062	4.97093	0.093273		1814.39	15.9094	1855.5	19.6603	1764.81	28.705		36.7149	13.1121	945.835	1.42263	0	2.5258	0.0949282	13.1461	0.149398	2.2389	3.95914	0.597688	20.3691	6.92227	80.3128	31.4542	142.236	29.8911	276.601	57.1479	8764.68	0.522594	88.3465	92.2298	845.133	-13.4834
20XRdelt-3-25	152.138	126.434	1.2033	0.111545	0.001757	0.336298	0.00381	5.17611	0.089043		1848.7	14.693	1868.83	18.4087	1824.99	28.86
20XRdelt-3-26	324.149	194.069	1.67028	0.109273	0.0018	0.282439	0.002822	4.26435	0.076935		1686.51	14.8835	1603.63	14.2142	1787.35	25.1525		37.7776	25.7499	2859.96	3.11269	0.0498264	0.717334	0.240963	22.9268	0.741682	9.99723	15.6555	2.32543	77.0442	23.3004	265.202	96.1621	405.892	78.351	685.335	132.971	8410.43	0.751003	324.149	194.069	927.091	-12.2299
20XRdelt-3-27	2690.51	804.69	3.34354	0.100508	0.001404	0.225981	0.002641	3.14709	0.055993		1444.29	13.7447	1313.4	13.9075	1635.18	25.92		36.4451	6.87798	3744.81	1.19992	0	7.41484	0.402189	47.8874	1.31823	17.862	24.7005	3.01757	99.9123	30.1482	329.03	113.455	461.338	89.9448	757.493	132.766	9356.42	1.75123	2690.52	804.69	776.602	-14.0109
20XRdelt-3-28	200.798	158.982	1.26303	0.108925	0.001763	0.27217	0.003085	4.09837	0.075196		1653.98	15.0182	1551.81	15.6553	1783.34	29.63		36.968	15.7928	2287.99	1.65902	0.0266495	12.1223	1.52171	20.8692	0.962058	10.0485	13.2318	1.8592	63.469	19.3077	214.413	77.0782	327.233	64.0233	558.889	109.194	8779.86	0.481901	200.799	158.982	866.584	-12.8966
20XRdelt-3-29	1224.32	320.509	3.81993	0.110174	0.001556	0.311352	0.004223	4.76144	0.093833		1778.13	16.581	1747.36	20.7791	1802.16	25.615		37.2564	13.7166	2798.37	2.37928	0.0175151	7.03161	0.54845	49.0293	1.49798	19.7462	23.5735	3.95617	92.8631	27.656	286.904	90.5506	346.952	67.168	571.158	94.4691	9228.38	3.20461	1224.32	320.509	850.256	-12.217
20XRdelt-3-30	796.804	570.507	1.39666	0.108988	0.001375	0.318892	0.003985	4.81474	0.082576		1787.48	14.4707	1784.31	19.4993	1783.34	22.07		37.5145	14.759	2845.58	5.83437	0.00741069	3.69055	0.336788	65.9113	0.578052	7.24002	12.1449	0.674634	61.6964	20.7146	246.039	89.8253	394.983	79.5913	694.519	128.239	9681.95	3.36413	796.804	570.507	858.682	-12.1026
20XRdelt-3-31	3230.02	1675.12	1.92823	0.10145	0.001181	0.191417	0.003053	2.69245	0.052897		1326.38	14.574	1129.05	16.5281	1650.92	21.6025
20XRdelt-3-32	7488.99	2863	2.61578	0.100016	0.001078	0.215122	0.002531	2.98592	0.047153		1404.04	12.0498	1256.05	13.4421	1624.38	19.2875		36.4727	6.57461	9493.23	7.58246	0.00964007	28.3076	1.01134	179.394	2.68833	35.501	46.7391	2.22627	189.356	62.2751	711.637	262.737	1185.48	257.549	2338.78	419.118	13399.1	4.37126	7488.99	2863	772.123	-12.8819
a Ferry and Watson (2007)
b Loucks et al., 2020
REFERENCES CITED
Ferry, J.M., and Watson, E.B., 2007, New thermodynamic models and revised calibrations for the Ti-in-zircon and Zr-in-rutile thermometers: Contributions to Mineralogy and Petrology, v. 154, p. 429–437, https://doi.org/10.1007/s00410-007-0201-0.
Loucks, R. R., Fiorentini, M. L., and Henríquez, G. J., 2020, New magmatic oxybarometer using trace elements in zircon: Journal of Petrology, v. 61, no. 3, p. egaa034. https://doi.org/10.1093/petrology/egaa034.

## Sheet: TABLE S2
TABLE S2. ZIRCON Hf AND O ISOTOPIC DATA FOR THE GUSHICUN INTRUSIONS
Spot No.	176Hf/177Hf	1σ	176Lu/177Hf	176Yb/177Hf		(176Hf/177Hf)i	εHf(t)	TDM	δ18Ocorrect	2SE (‰)
								(Ma)
Gushicun granites
20XRHG-1-01	0.281409	1.1051e-05	0.00200916	0.057674		0.281325	-11.5	2643
20XRHG-1-02	0.281276	1.29767e-05	0.00246573	0.0703068		0.281169	-17	2864
20XRHG-1-03	0.281586	1.34146e-05	0.0031807	0.092186		0.281513	-4.8	2472
20XRHG-1-04	0.28149	1.16022e-05	0.00215197	0.0619421		0.281422	-8.1	2540
20XRHG-1-05	0.281264	1.29029e-05	0.00200795	0.0569955		0.281196	-16.1	2845
20XRHG-1-06	0.281431	9.50006e-06	0.00201423	0.0594767		0.281352	-10.5	2613
20XRHG-1-07	0.2814	1.14467e-05	0.00232407	0.0661398		0.281313	-11.9	2678
20XRHG-1-08	0.281341	1.03404e-05	0.00258691	0.0735707		0.281243	-14.4	2781
20XRHG-1-09	0.281485	1.12882e-05	0.00290122	0.0834844		0.281396	-9	2599
20XRHG-1-10	0.281472	7.65506e-06	0.00262567	0.0766921		0.281374	-9.7	2598
20XRHG-2-01	0.281667	1.40912e-05	0.00287403	0.0823373		0.281578	-2.5	2335	5.3653	0.150905
20XRHG-2-02	0.281429	1.03405e-05	0.00263319	0.0770644		0.28131	-12	2660	4.76187	0.227741
20XRHG-2-03	0.281317	1.09396e-05	0.00352814	0.102454		0.281242	-14.4	2889	5.19624	0.155851
20XRHG-2-04	0.281416	1.04387e-05	0.00222247	0.0646225		0.281313	-11.9	2649	5.45107	0.112201
20XRHG-2-05	0.28139	1.14127e-05	0.00304265	0.0888047		0.281328	-11.4	2746	5.4032	0.15678
20XRHG-2-06	0.281434	8.12708e-06	0.00180949	0.0553076		0.281358	-10.3	2594	4.93093	0.175693
20XRHG-2-07	0.281432	1.04402e-05	0.00225166	0.0641996		0.281354	-10.5	2628	5.58423	0.183805
20XRHG-2-08	0.281424	9.34781e-06	0.0023122	0.0678346		0.281305	-12.2	2643	5.46903	0.330999
20XRHG-2-09	0.281575	1.00877e-05	0.00353604	0.103748		0.281493	-5.5	2513	5.16233	0.149179
20XRHG-2-10	0.28148	1.23436e-05	0.00242391	0.0682153		0.281388	-9.3	2572	5.41567	0.194333
20XRHG-2-11	0.281507	1.27216e-05	0.00271785	0.0771526		0.281419	-8.2	2555
20XRHG-2-12	0.28141	1.17723e-05	0.00258857	0.0747356		0.281318	-11.7	2683
20XRHG-2-13	0.281518	1.21901e-05	0.00271867	0.0779874		0.281403	-8.7	2538
20XRHG-2-14	0.281411	1.14572e-05	0.00341533	0.0992205		0.281365	-10.1	2743
Gushicun diorites
20XRdelt-3-01	0.281349	8.01569e-06	0.00136491	0.0391806		0.281302	-12.3	2680	3.4039	0.176496
20XRdelt-3-02	0.281437	1.09187e-05	0.00139459	0.0377274		0.281389	-9.2	2562	5.09051	0.180934
20XRdelt-3-03	0.281428	8.82342e-06	0.00140304	0.0401649		0.281326	-11.4	2575	5.287	0.161936
20XRdelt-3-04	0.281406	1.18039e-05	0.00300006	0.0869797		0.281343	-10.8	2719	5.29149	0.145306
20XRdelt-3-05	0.281446	9.4708e-06	0.00186321	0.0547582		0.28139	-9.2	2581	3.89961	0.396688
20XRdelt-3-06	0.281454	9.65961e-06	0.00165141	0.0467487		0.281406	-8.6	2555	4.709	0.3476
20XRdelt-3-07	0.281305	1.30104e-05	0.00142664	0.0395498		0.281254	-14	2745	4.49406	0.163127
20XRdelt-3-08	0.281313	9.62576e-06	0.00152222	0.0432925		0.281273	-13.4	2742	5.17878	0.165791
20XRdelt-3-09	0.281401	1.05786e-05	0.00117897	0.0326371		0.281311	-12	2597	5.42614	0.134654
20XRdelt-3-10	0.281452	1.26921e-05	0.00264867	0.0766273		0.281383	-9.4	2628	4.96284	0.141103
20XRdelt-3-11	0.281531	1.06795e-05	0.00203483	0.0660285		0.281455	-6.9	2474
20XRdelt-3-12	0.281439	8.93185e-06	0.00225453	0.0700124		0.28132	-11.7	2619

## Sheet: TABLE S3
TABLE S3. WHOLE-ROCK MAJOR AND TRACE ELEMENT DATA FOR THE GUSHICUN INTRUSIONS
Sample No.	20XRδ-1	20XRδ-3	20XRδ-4	20XRδ-5	21XRδ-6	21XRδ-7	21XRδ-8	21XRδ-9	21XRδ-10		20XRhg-1	20XRhg-2	20XRhg-3	20XRhg-4	20XRhg-5	21XRhg-6	21XRhg-7	21XRhg-8	21XRhg-9		20XR-1	20XR-3	20XR-4	20XR-5	20XR-6	20XR-7	XY-048	XY-049	XY-052	XY-057	XY-061	XY-065	XY-066	XY-068	XY-071	XY-078	XY-080	XY-081	XY-082	XY-088	XY-098	XY-101	XY-102-2	XY-110-1	XY-114-1	XY-116	XY-122	XY-140	XY-145
Rock type	Gushicun diorite										Gushicun granites										Xiong'er lavas
Na2O	2.3484	2.44506	2.72189	3.26489	2.73094	2.5626	2.64626	2.62194	2.59322		4.17479	4.40712	4.08301	4.1948	4.16129	3.34515	4.23033	4.09603	4.56748		2.2971	1.75822	2.9612	3.54063	2.60117	2.81826	2.27846	2.11202	2.51991	1.98397	1.70913	2.51396	3.19284	3.68122	4.26978	3.66346	2.78271	2.81399	4.80582	2.50557	1.68163	1.57395	2.94466	2.65757	2.98207	2.15619	3.02969	3.27308	2.59477
MgO	3.38816	3.38981	3.21918	3.83269	3.13761	3.43862	3.62258	3.54327	3.56493		0.789046	0.772423	1.02523	0.776592	0.815108	1.25803	0.610396	0.639047	0.828391		3.89808	3.38043	3.20394	5.69164	2.98115	4.85829	6.22304	5.16315	5.293	6.09577	4.79375	4.05704	4.41989	4.95272	1.92589	4.92645	4.18328	4.04037	4.0593	2.27539	5.88954	4.70364	4.73863	4.38826	3.9015	4.29787	5.30003	4.59063	3.96259
Al2O3	14.0328	13.9918	14.3605	14.0917	14.3341	14.3043	14.5056	14.1761	14.1662		13.0232	13.2404	13.4105	13.1361	13.4382	13.4511	12.979	12.9548	13.3272		14.9392	12.8317	14.4192	15.7251	14.5437	14.5259	16.1084	14.7399	14.5562	14.4943	16.6541	14.4407	14.4714	16.0528	15.1064	14.8199	15.1193	14.9371	15.1145	12.949	14.8595	14.2058	14.233	13.6234	14.6029	14.2569	14.4285	14.0807	14.0881
SiO2	56.5719	56.3342	56.6858	55.8367	57.4292	56.8858	56.9809	57.5701	57.233		68.2962	68.5834	66.9967	68.2822	68.4086	68.7896	71.5063	70.4078	68.0985		49.5345	52.7763	51.7666	52.7744	50.2259	55.5105	51.0178	54.4941	53.869	52.2432	54.2635	55.911	54.9374	54.8584	59.8424	55.5979	55.3063	55.972	54.3794	57.1355	51.4983	56.0603	54.452	58.2791	55.9316	56.0725	55.389	57.3248	55.52
P2O5	0.585363	0.646302	0.592687	0.614448	0.536524	0.606164	0.60512	0.57634	0.579401		0.141114	0.148273	0.195897	0.142925	0.154346	0.228372	0.129355	0.108648	0.153661		0.462417	0.427889	0.452237	0.297206	0.454583	0.24962	0.339865	0.294701	0.282607	0.261483	0.346009	0.291363	0.349217	0.277259	0.498076	0.253951	0.265574	0.280622	0.255948	0.524035	0.322279	0.537751	0.465597	0.426904	0.434906	0.529861	0.508156	0.389168	0.423557
K2O	3.25224	3.43014	3.47899	2.74676	3.6087	3.07613	2.96153	3.14247	3.02476		4.02175	3.9062	3.72204	4.17781	4.14616	4.65283	4.62749	4.07924	3.95284		4.33753	0.820038	1.8724	2.34882	1.48908	2.22113	1.70714	3.09337	2.60136	1.5864	3.90211	3.75801	3.26959	3.43023	5.00127	3.01458	3.11032	2.97809	1.14886	4.1051	2.27712	5.35259	2.92471	3.64214	3.416	3.34064	3.01044	2.78226	2.82695
CaO	5.68001	5.55457	5.90048	5.42762	5.89874	6.09084	6.20172	5.89429	5.83022		2.33037	1.96462	2.55561	2.13888	2.1094	0.682137	0.574015	1.6959	2.18376		4.02293	7.61861	6.48341	3.77919	8.14568	5.35067	6.38711	5.69656	6.46758	7.70841	2.04754	3.25771	3.5977	2.29687	2.5773	2.55399	4.48956	4.5822	3.76942	4.37349	6.38017	1.82701	2.96557	2.6095	3.95112	3.82892	2.90265	2.92167	4.77959
TiO2	1.69061	1.89858	1.73442	1.76933	1.32067	1.70773	1.73705	1.63161	1.79453		0.602219	0.626154	0.760716	0.601684	0.650674	0.843983	0.573004	0.507682	0.64518		1.80772	1.63908	1.73039	1.22759	1.72383	1.01218	1.17683	1.00689	1.01856	0.958448	0.823197	0.979517	1.1503	1.00592	1.52841	0.947246	0.917879	0.914692	1.12462	1.55056	1.0361	1.13493	1.47376	1.28744	1.28137	1.41651	1.41187	1.32627	1.29204
MnO	0.158743	0.178464	0.153246	0.161217	0.130859	0.14701	0.153568	0.148144	0.153903		0.0546569	0.052096	0.0656304	0.0539717	0.0605278	0.0675187	0.0454765	0.0434592	0.0522054		0.186764	0.220398	0.194392	0.185878	0.188	0.163476	0.15333	0.146368	0.148172	0.119563	0.0827	0.0216709	0.111178	0.103614	0.121605	0.0595738	0.167048	0.170588	0.162159	0.151242	0.168475	0.164507	0.0718919	0.116874	0.112495	0.170265	0.138267	0.152062	0.167478
Fe2O3T	11.2608	10.5899	9.54895	10.6778	9.42998	10.0107	10.3577	10.0809	10.1161		3.95815	4.09254	4.90339	3.86697	4.14515	4.97026	3.45707	3.37824	3.83078		16.3104	15.3514	15.1374	11.1368	15.235	9.77824	11.1267	9.8263	10.1532	9.95192	9.54092	9.22298	9.91142	9.11161	6.83146	10.4873	9.82916	10.0179	11.5206	11.9098	11.3933	10.1626	10.4047	8.88422	10.322	9.77246	10.1429	9.7989	11.3039
LOI	0.960917	1.41124	1.47386	1.84681	1.30462	0.802296	0.458136	0.570559	0.931465		2.55844	1.97679	2.23125	2.03812	1.84059	1.77127	1.16921	1.95674	2.04113		2.40337	3.27589	1.96888	3.24274	2.40196	3.04169	3.29861	2.71973	2.83688	3.72399	4.89604	4.10053	4.03866	3.65897	2.33747	3.43619	3.05127	2.88696	3.0303	2.04009	3.76954	4.13445	4.96454	3.84092	2.69734	3.27986	3.75966	3.18697	2.84869
Total	99.93	99.87	99.87	100.27	99.862	99.6321	100.23	99.9558	99.9876		99.95	99.77	99.95	99.41	99.93	100.06	99.9017	99.8676	99.6811		100.2	100.1	100.19	99.95	99.99	99.53	99.8173	99.2931	99.7466	99.1275	99.059	98.644	99.442	99.4476	99.978	99.868	99.226	99.586	99.36	99.537	99.272	99.765	99.684	99.752	99.691	99.09	100.035	99.842	99.818
Li	10.542	11.4201	12.7856	18.8676	35.4208	12.9103	9.79839	10.4321	12.9841		6.21887	6.27151	4.21182	3.4247	3.38995	5.42295	5.81767	6.09829	3.81919		13.7864	15.5891	12.5496	16.5997	10.6302	14.8224	30.2692	19.5785	23.7941	28.1681	38.0834	41.9963	40.761	41.2592	19.6242	42.9289	28.4487	35.4055	33.2572	20.7223	59.3126	49.607	51.4146	58.1441	35.0696	43.987	43.0452	41.3752	31.3971
Be	2.98059	3.05227	2.48453	2.14122	1.1113	2.03558	2.32457	2.09234	2.45411		2.96782	2.82517	2.66913	2.97962	2.60697	3.11176	2.95061	2.66256	2.13156		2.50232	2.286	2.44855	1.95048	2.60816	1.99901	1.38707	1.23041	1.30287	1.11583	2.64774	2.49381	1.69822	1.4163	2.5192	1.5925	1.4758	1.71189	0.748995	1.78616	1.38177	1.5504	2.55962	2.73376	2.25018	2.00725	1.94617	2.5428	1.99083
Sc	24.1774	26.2421	24.697	25.7817	35.0469	23.502	24.3851	23.9005	24.8442		10.3998	10.5021	12.1722	9.99139	10.6479	6.47861	7.95808	7.1649	8.70656		41.6179	38.1156	39.2338	27.0401	42.1776	28.0048	24.4821	22.5413	23.1162	25.5033	21.2239	27.1956	26.5517	25.2183	22.5416	26.7584	25.3889	26.5155	28.1722	27.4028	26.0222	23.9102	25.304	22.0722	22.7423	32.0418	22.6279	23.774	24.1672
V	172.043	182.608	169.056	171.142	234.513	158.437	170.523	159.587	159.259		39.4373	38.7565	53.9211	40.1183	43.6512	32.2682	37.3706	33.1878	43.6316		220.307	203.889	209.339	166.635	220.041	172.09	155.803	137.144	140.29	139.563	115.806	137.174	154.78	135.938	124.048	141.704	139.357	137.357	176.678	163.86	164.319	160.045	175.32	135.691	149.165	142.082	157.799	158.22	166.492
Cr	119.551	121.677	119.18	116.456	28.6829	117.598	127.015	118.626	122.631		13.717	13.3218	22.8602	14.3962	15.8288	7.10596	7.66362	8.84884	12.6669		42.8042	35.9496	39.6441	156.246	38.1947	151.766	228.911	187.151	183.603	295.007	80.1312	79.1679	45.327	77.9897	23.8265	146.032	161.441	190.886	169.577	0.674204	157.636	126.523	116.837	87.6388	113.783	136.727	151.596	101.941	118.793
Ni	22.3673	24.6789	24.7576	22.3676	82.5722	25.5451	26.7027	25.9746	26.2739		5.21719	3.80127	5.20402	3.99047	4.17573	2.37038	2.88859	2.74017	4.08121		25.1739	23.5141	21.8231	46.0172	20.6749	42.1023	24.6287	20.8028	19.257	79.8785	9.01017	15.0572	8.90768	16.742	4.30402	34.6307	38.7146	39.6052	36.4524	-4.41807	32.5977	14.9073	16.8832	14.6984	18.784	15.0995	31.9769	17.708	25.9341
Cu	18.5814	18.8562	20.7811	21.855	110.916	26.4846	27.8181	26.5771	22.2828		8.33809	7.90737	5.07111	6.40841	5.24845	8.98833	5.91847	9.7305	6.58785		28.0667	37.7217	35.8931	12.6409	46.0343	39.707	16.6625	21.8382	25.334	17.7464	12.104	15.7647	14.9596	16.6967	16.3705	28.8246	27.62	24.3758	12.5435	16.0439	29.1478	15.8585	18.3557	38.019	59.2072	30.9746	14.3921	28.8754	34.7751
Zn	116.732	130.169	115.065	149.765	113.199	147.578	141.848	138.202	140.203		66.4678	47.5551	50.8952	48.5673	45.8498	44.8742	55.9546	48.2468	74.0054		171.286	134.46	128.621	155.964	115.728	144.051	146.633	113.014	118.176	99.4114	102.254	107.78	120.394	119.293	59.8773	156.214	120.065	122.178	108.663	121.429	125.272	63.8601	152.323	148.755	138.468	147.33	184.328	167.417	116.25
Ga	19.1443	19.5568	19.6373	18.3868	20.57	22.7268	22.6729	22.0507	22.5748		15.2481	16.2207	17.2751	16.436	16.9553	18.4923	19.0626	18.1729	19.3882		20.2988	19.6118	20.0552	16.7788	21.9483	15.9506	20.8468	18.2716	18.2532	17.3637	19.004	19.5206	18.3509	17.3813	18.5819	18.62	18.914	20.0681	20.763	20.2133	20.0967	18.8061	20.7936	19.6264	21.2466	20.8262	21.6136	19.3646	20.7398
Rb	69.6577	75.435	73.2772	59.1841	51.8382	69.7299	65.8967	74.779	77.3316		72.4211	68.2217	66.719	77.4096	75.7816	93.2004	105.053	82.7034	81.3373		102.163	7.69519	16.7414	18.7782	13.6127	19.3442	37.4285	54.3194	57.9759	44.427	143.057	83.67	72.3528	63.5989	101.762	61.9381	59.1856	62.1848	17.0651	77.8178	33.6875	89.3924	56.8031	69.1297	71.1723	73.7088	68.6419	41.9448	59.2481
Sr	355.143	333.134	378.57	378.496	201.509	433.97	446.999	434.981	457.873		59.4038	61.9331	148.208	113.456	117.229	61.8936	79.1458	51.4486	123.806		303.96	358.821	353.693	170.581	456.006	284.546	384.904	280.655	367.672	311.615	179.763	324.141	368.968	279.368	121.768	386.061	293.223	252.766	454.953	166.632	333.153	85.9444	219.281	96.572	212.316	264.891	276.945	273.193	307.051
Y	44.3911	48.2364	45.1849	41.6693	23.1317	44.3841	44.233	44.9115	45.6905		40.9578	47.2832	43.564	35.703	36.0141	38.1455	45.8517	37.9886	38.0559		50.4905	48.5199	47.8896	30.3395	50.1283	29.816	26.8368	23.8435	24.4299	22.3654	24.8245	30.2674	28.4079	21.9993	37.5109	31.6733	30.8413	33.1365	27.8917	44.6941	34.6544	40.0021	37.8913	37.5548	37.7854	39.6934	40.8999	39.0479	40.343
Zr	343.571	346.932	352.197	248.629	109.258	378.945	363.613	377.807	376.617		309.249	372.359	306.192	314.945	323.63	169.92	821.384	235.155	347.672		256.23	234.977	246.87	173.726	247.633	149.059	180.292	153.147	158.629	124.448	171.541	207.09	201.747	143.804	289.9	204.667	204.138	222.999	214.618	292.042	174.858	327.05	272.522	319.628	300.169	318.728	339.095	226.145	252.451
Nb	15.2282	17.5049	15.5582	14.8147	4.46293	16.6999	15.7453	15.3225	17.9381		16.1574	19.808	19.3736	16.0758	17.1965	19.5428	20.8184	19.6815	19.3308		12.0656	11.1517	11.6879	7.73247	11.6913	6.47855	8.31861	7.00251	7.66501	5.64526	7.91881	9.60263	9.27835	6.31768	14.3659	8.64545	8.31086	9.28983	9.081	13.1664	7.8748	15.6475	12.8384	14.8669	14.7806	15.0914	16.327	10.6894	11.2884
Cs	0.530996	0.452755	0.521295	0.486982	3.2935	0.463002	0.469067	0.600608	0.552923		0.118443	0.0998475	0.143153	0.149794	0.139911	0.145462	0.206534	0.119782	0.147429		9.30834	0.593009	0.431787	0.582414	0.428296	0.543323	0.655639	0.397337	0.727917	0.192727	2.65492	0.383494	0.330355	0.244005	1.2246	1.01873	0.639316	0.566563	0.0981502	0.381138	0.290095	0.866095	0.444274	0.641279	0.266369	0.513814	0.174066	0.665675	0.391798
Ba	1623.15	1627.82	1546.26	1853.08	286.232	1588.2	1577.87	1714.28	1728.02		1062.41	907.403	948.531	1143.96	1121.31	1178.68	1582.85	1011.95	1085.26		1841.3	615.758	1456.81	1419.81	1165.18	1254.53	1044.26	1274.09	1226.87	1090.67	1004.77	1518.74	1726.03	1754.55	1450.63	1707.5	1131.48	1320.61	476.629	1528.4	1524.31	1625.95	1328.92	1183.8	1333.18	1230.55	1362.3	687.36	1331
La	65.0568	70.0394	66.5898	54.7269	18.6916	66.7608	62.0467	65.6307	66.0273		69.0598	60.2191	64.4185	58.1174	54.5647	66.2398	66.0169	54.2956	44.3842		49.1006	45.9611	45.6777	31.895	47.7784	30.8843	38.1763	35.3742	37.2364	27.3856	14.4701	44.2064	43.756	28.2472	38.7652	39.1115	37.071	41.4203	63.2401	51.5944	38.8052	84.3177	66.6457	62.2629	65.2854	64.4968	71.0987	35.8109	54.1873
Ce	125.454	134.152	127.445	109.354	40.9742	144.716	134.101	139.781	142.071		129.208	120.058	124.809	113.35	109.699	147.709	155.565	125.225	105.034		101.442	95.0745	96.3462	67.9512	98.7313	63.7638	78.8933	69.713	71.9221	56.5438	29.0718	85.3147	83.708	60.5517	76.9106	74.035	73.8763	81.2261	108.22	105.81	77.626	161.458	123.579	125.764	123.246	124.003	133.071	80.3787	105.548
Pr	17.1879	18.6482	17.5368	14.971	4.81752	16.3896	15.2777	15.8472	16.1345		16.4337	15.958	16.7897	14.374	14.0999	14.5479	15.2205	13.249	11.7896		12.4689	11.7434	11.795	7.97944	12.272	7.48442	9.61676	8.45198	8.79538	6.95094	4.274	10.5101	10.0172	7.38879	10.0749	9.2002	9.3315	10.0528	12.4963	13.5203	9.41028	21.7915	15.044	16.0422	15.5742	15.571	16.7103	10.4515	12.9313
Nd	57.9873	63.302	59.0944	53.1231	21.0473	68.9659	65.5511	67.4983	68.9127		50.3866	51.6887	54.4528	44.9947	45.1907	54.3747	58.4905	51.8505	47.7852		49.2646	46.3583	46.9925	31.8909	48.1272	29.9146	37.3722	32.9282	33.9552	27.8137	20.1501	39.9147	39.1609	29.457	41.8476	36.3926	38.6416	39.0193	53.2583	53.4778	38.151	83.5649	55.7964	59.1178	59.488	60.3114	62.9939	40.8734	50.5146
Sm	10.8811	11.7097	10.9279	9.85995	4.28423	12.2492	11.7893	12.1689	12.407		8.94109	9.52662	9.77557	8.06775	8.43568	9.3146	10.1862	9.28089	8.88365		9.43526	9.1578	9.01199	6.1911	9.34941	5.96383	7.05944	6.20059	6.56495	5.42219	5.61496	7.78285	7.44362	5.63383	10.4636	7.14488	7.22387	7.51333	10.4173	10.339	7.57763	14.8378	10.3414	10.6421	10.4508	11.0237	11.4406	8.51698	9.67681
Eu	2.50751	2.59511	2.63144	2.59566	1.18462	2.63655	2.66287	2.62625	2.68764		1.40873	1.45991	1.53963	1.5061	1.39798	1.3106	1.5508	1.35293	1.53168		2.47126	2.3703	2.41818	1.65971	2.66713	1.9096	2.01201	1.7511	1.86561	1.65333	2.05491	1.86902	2.0296	1.63408	2.49638	1.99776	1.98483	2.13185	3.73781	2.42613	1.94017	3.55937	2.64367	2.4136	2.43635	2.43804	2.62886	2.37223	2.60204
Gd	10.3652	11.2432	10.8973	9.44248	4.67555	12.1437	11.5906	11.9813	11.8974		8.53372	9.17274	9.54026	7.80326	8.12874	9.11016	10.1016	9.3814	8.89364		9.96419	9.23071	9.20297	6.04992	9.67649	5.89374	5.84688	5.33739	5.46723	4.73065	5.57634	6.561	6.31422	4.86414	8.9104	6.64726	6.40064	6.69296	8.75208	8.85542	6.77211	11.0825	8.19601	8.98044	8.55322	8.83074	9.24463	7.6102	8.07562
Tb	1.66998	1.83978	1.7107	1.54815	0.713564	1.62439	1.56415	1.59532	1.65804		1.39878	1.55074	1.59925	1.33521	1.32505	1.30391	1.41992	1.29402	1.31606		1.56977	1.46528	1.52687	0.98907	1.55903	0.943622	0.935535	0.850622	0.841909	0.73137	0.901887	1.02228	0.993468	0.776868	1.41404	1.03946	0.985824	1.05173	1.28517	1.52145	1.12698	1.58043	1.33672	1.37788	1.39388	1.39577	1.45344	1.27569	1.29627
Dy	8.58229	9.02782	8.65911	7.6795	4.57908	9.48054	9.35093	9.42974	9.59444		7.1558	8.24313	8.24094	6.832	7.04917	8.22185	9.165	8.3411	8.26681		8.94344	8.4441	8.58006	5.54532	8.73129	5.26091	5.05693	4.6144	4.66867	4.09508	5.04741	5.68686	5.3926	4.32424	7.78117	6.01465	5.71567	6.04657	6.31207	8.33731	6.48635	8.12349	7.49333	7.39566	7.47052	7.63969	8.03365	7.21255	7.5361
Ho	1.85708	1.98246	1.8502	1.64991	0.910499	1.76285	1.75598	1.75662	1.79152		1.56591	1.8687	1.8067	1.51377	1.55628	1.55325	1.8616	1.59223	1.56005		1.9518	1.84752	1.83633	1.17073	1.94181	1.09533	1.0336	0.91244	0.969599	0.845027	0.978912	1.15262	1.10403	0.846089	1.5455	1.27823	1.207	1.24443	1.20975	1.80335	1.37285	1.62653	1.50971	1.52364	1.52847	1.57161	1.60364	1.50018	1.55213
Er	4.71626	5.01054	4.73976	4.36394	2.80448	5.30768	5.09994	5.15486	5.38662		4.24476	5.22974	4.90755	4.12077	4.16495	4.91679	5.98292	4.91692	4.91975		5.31189	5.09233	5.16176	3.2662	5.26238	2.98363	3.10168	2.68639	2.7473	2.41495	2.64174	3.36478	3.27721	2.56656	4.33796	3.76566	3.57592	3.83711	3.56495	5.29987	3.9432	5.01542	4.56839	4.28533	4.40514	4.43822	4.76657	4.53788	4.39679
Tm	0.753444	0.805726	0.750456	0.67972	0.39617	0.685828	0.677919	0.701355	0.705109		0.7041	0.85236	0.782053	0.675352	0.670846	0.68604	0.90396	0.686897	0.697871		0.809012	0.78151	0.786611	0.491637	0.808118	0.440961	0.421091	0.365532	0.368484	0.350453	0.363435	0.472602	0.450434	0.355104	0.593026	0.524786	0.49658	0.539327	0.495467	0.742305	0.568925	0.677371	0.613235	0.580798	0.605751	0.624233	0.639681	0.601271	0.601059
Yb	4.27438	4.50358	4.33083	3.89769	2.94163	4.64952	4.74382	4.71151	4.84836		4.15798	4.95923	4.58899	3.95577	4.10924	4.70155	6.5468	4.83668	4.73778		5.28289	4.9047	5.04522	3.07667	5.188	2.93607	2.68381	2.44719	2.4703	2.3685	2.39192	2.99741	2.93009	2.34594	3.82058	3.40677	3.29357	3.59683	3.31297	4.87548	3.79052	4.35262	4.09395	3.734	4.08986	3.87131	4.15722	4.09674	3.97397
Lu	0.745371	0.765011	0.727727	0.66399	0.437434	0.722868	0.69605	0.680579	0.728775		0.686682	0.889246	0.752073	0.685033	0.711165	0.689334	1.00872	0.708994	0.693857		0.858006	0.837005	0.838705	0.516931	0.894528	0.4634	0.406106	0.35681	0.364565	0.365433	0.35963	0.451039	0.423895	0.3553	0.565712	0.53481	0.506299	0.559941	0.514121	0.709868	0.57071	0.656288	0.632209	0.560024	0.588731	0.592341	0.626127	0.637733	0.598175
Hf	9.34789	9.6328	9.52771	6.34706	2.98831	8.98065	8.47065	8.91884	9.136		8.64892	10.8284	8.61496	8.97724	9.07508	5.75877	18.851	6.9354	8.79144		7.12604	6.59789	6.98141	4.7218	6.96566	3.87541	4.76016	4.0169	4.20002	3.4396	4.53176	5.56229	5.14016	3.92522	7.65771	5.58568	5.42532	5.97677	5.54695	7.88297	4.85249	8.4826	6.91386	8.16934	7.59649	7.87895	8.55529	6.15957	6.62845
Ta	0.931117	0.986685	0.93719	0.790994	0.609067	1.21461	1.18874	1.50938	1.37356		1.09832	1.28894	1.2006	1.12852	1.16879	1.76224	1.767	1.76558	1.54585		0.801504	1.09845	0.748	0.499471	0.784792	0.43006	0.531581	0.45464	0.476991	0.369768	0.500314	0.580957	0.559317	0.390243	0.849967	0.536389	0.500172	0.597364	0.535017	0.789989	0.493144	0.863681	0.70514	0.85601	0.789563	0.860507	0.921057	0.628639	0.657331
Pb	17.7933	17.1721	14.961	17.1366	2.7824	16.602	16.1669	17.9132	17.6144		9.41876	4.42177	9.28909	10.9745	13.24	7.13125	11.4686	7.26928	20.448		10.3628	14.4667	12.9891	6.87606	18.8854	20.2151	24.426	32.8402	22.2434	12.0892	8.58108	23.6227	17.3081	13.7824	16.8849	48.8257	47.113	45.2049	14.2428	34.64	44.9437	27.6634	23.4505	43.2962	38.8221	38.5374	17.5056	12.9657	102.829
Th	4.32089	4.48842	4.71476	3.41174	2.85706	4.74676	4.31897	4.40273	4.30268		16.5872	15.7092	13.2448	13.9823	13.1673	19.3267	23.8121	16.4545	12.5606		3.26139	2.99096	3.18447	1.71807	3.13624	1.43368	2.77915	2.36123	2.48233	1.63092	2.19346	6.73979	4.16445	2.5304	5.15621	3.0183	2.79029	3.17006	3.03121	6.32789	2.94817	5.31467	3.70771	7.59027	5.9457	5.98559	6.9756	3.56496	3.59769
U	0.818826	0.827192	0.886345	0.7002	1.0389	1.16465	1.07947	1.11358	1.13747		2.372	2.89883	2.16537	2.45315	2.55244	2.90371	5.39766	2.82078	2.78436		0.599061	0.599161	0.645728	0.334161	0.64878	0.335366	0.606833	0.496731	0.508117	0.37441	0.402294	1.1779	0.664696	0.446566	0.985405	0.479305	0.502442	0.535209	0.522917	1.08623	0.651649	0.969726	0.69441	1.20322	0.934961	1.07636	1.17186	0.597069	0.660932
a Huang et al., 2010
Huang, X.-L., Niu, Y., Xu, Y.-G., Yang, Q.-J., and Zhong, J.-W., 2010, Geochemistry of TTG and TTG-like gneisses from Lushan-Taihua complex in the southern North China Craton: implications for late Archean crustal accretion: Precambrian Research, v. 182, no. 1-2, p. 43-56. https://doi.org/10.1016/j.precamres.2010.06.020.
[truncated: 31 more columns]

## Sheet: TABLE S4
											TABLE S4. WHOLE-ROCK ND ISOTOPIC DATA FOR THE GUSHICUN INTRUSIONS
											Sample No.	Sm	Nd	147Sm/144Nd	143Nd/144Nd	(±2sm)	143Nd/144Ndt	εNd(t)
												(ppm)	(ppm)
											Gushicun diorites
											20XRδ-1	10.8811	57.9873	0.113411	0.511327	4.12509e-06	0.509999	-6.57963
											20XRδ-3	11.7097	63.302	0.1118	0.511334	5.92313e-06	0.510025	-6.07773
											20XRδ-4	10.9279	59.0944	0.111765	0.511341	5.742e-06	0.510032	-5.9355
											20XRδ-5	9.85995	53.1231	0.112178	0.511354	6.38877e-06	0.510041	-5.76102
											Gushicun granites
											20XRhg-1	8.94109	50.3866	0.107245	0.511195	3.96334e-06	0.509939	-7.75789
											20XRhg-2	9.52662	51.6887	0.111391	0.511276	4.15267e-06	0.509972	-7.11133
											20XRhg-3	9.77557	54.4528	0.108499	0.511224	5.66879e-06	0.509953	-7.47207
											20XRhg-4	8.06775	44.9947	0.108366	0.511198	6.59463e-06	0.50993	-7.94118
